# Supplementary material for: The Effects of Non-Pharmacological Interventions in Fibromyalgia: A Systematic Review and Metanalysis of Predominants Outcomes
Source: MDPI journal article supplement (doi:10.3390/biomedicines11092367), 2023-08-24
Supplement: s1 [file s1]

Supplementary Materials Table S1. Descriptive table.

| Auho              | Study type     | Sample characteristics                                                        | Objetives                                                                                                                                                                                                                                          | Intervention                                                                                                       | Variables evaluated*                                                                                                   | Outcomes                                                                                                                                                                                                                                                                                                                                               | Conclusions                                                                                                                                                                                                                                                                                                                              | Limits                                                                                                                                                                         | Follow-up |
|-------------------|----------------|-------------------------------------------------------------------------------|----------------------------------------------------------------------------------------------------------------------------------------------------------------------------------------------------------------------------------------------------|--------------------------------------------------------------------------------------------------------------------|------------------------------------------------------------------------------------------------------------------------|--------------------------------------------------------------------------------------------------------------------------------------------------------------------------------------------------------------------------------------------------------------------------------------------------------------------------------------------------------|------------------------------------------------------------------------------------------------------------------------------------------------------------------------------------------------------------------------------------------------------------------------------------------------------------------------------------------|--------------------------------------------------------------------------------------------------------------------------------------------------------------------------------|-----------|
| Bote et al., 2013 | Clinical Trial | N=16<br>EG= 8<br>Age 49±7<br>CG= 8<br>Age 47±4<br><br>EG = FM<br>CG = healthy | Comparing the effect of a single episode of moderate cycling on inflammation<br><br>Neutrophil activation by the IL-8 cytokine and monocytes synthesizing IL-1β, TNF-α, IL-6, IL-10, and IL-18<br><br>Response to stress (cortisol, NA, and Hsp72) | A moderate cycling sesión: 9 a.m, 45 minutes 55% of the maximum VO2 Fasted and at rest for at least one hour prior | FIQ<br>SF-36<br>Rpar-Q<br>Blood analysis: venous puncture.<br>Lyfestyle (diet, habits)<br>Medication<br>Other diseases | After exercise:<br>↓ IL-8, cortisol, NA, and Hsp72 in EG<br>↑ IL-8, cortisol, NA, and Hsp72 in CG<br>It is worthy noting that IL-8 in EG after the intervention is similar to CG in the basal line.<br><br>Release of inflammatory cytokines by monocytes: IL-1β, TNF-α, IL-6, IL-10, and IL-18<br>↓ EG ↑ CG<br><br>Neutropil activation:<br>↓ EG ↑ cG | EG reduction in IL-8 circulation with lower reléase of proinflammatory cytokines by monocytes and reduced neutrophil activation.<br><br>IL-8 correlated with pain<br><br>IL-10 NO ↓ as much as the proinflammatory cytokines in EG<br><br>A single session of moderate cycling induced an anti-inflammatory effecct in patients with FM. | The sample size is minimal, and the conditions of FM patients could result in variations in terms of inflammatory parameters.<br><br>Lack of follow-up after the intervention. | No        |

EG: experimental group; GC: control grupo; a.m.: ante meridiem; evaluated variables \*: can be seen in more detail in Supplementary materials 2

| Author            | Study type     | Sample characteristics                                                                            | Objetives                                                                                                                                                                                                                                                           | Intervention                                                                                                                                                                                                                                                                                                              | Evaluated variables *                                                                                                  | Outcomes                                                                                                                                                                                                           | Conclusions                                                                                                                                                                                                                                                                                               | Limits                                                                                                                                                                                                                     | Follow up |
|-------------------|----------------|---------------------------------------------------------------------------------------------------|---------------------------------------------------------------------------------------------------------------------------------------------------------------------------------------------------------------------------------------------------------------------|---------------------------------------------------------------------------------------------------------------------------------------------------------------------------------------------------------------------------------------------------------------------------------------------------------------------------|------------------------------------------------------------------------------------------------------------------------|--------------------------------------------------------------------------------------------------------------------------------------------------------------------------------------------------------------------|-----------------------------------------------------------------------------------------------------------------------------------------------------------------------------------------------------------------------------------------------------------------------------------------------------------|----------------------------------------------------------------------------------------------------------------------------------------------------------------------------------------------------------------------------|-----------|
| Bote et al., 2014 | Clinical Trial | N=20<br><br>EG= 10<br>Age 53±2<br><br>CG= 10<br>Age 50±4<br><br>EG = FM active<br>CG =FM inactive | Effect of regular exercise on the function of neutrophils (chemotaxis, phagocytosis, and microbicidal activity). IL-8 and NA as potential mediators of inflammation and stress.<br><br>How affected physical condition and the impact of the disease on daily life. | Warm water aquatic fitness program<br>8 months program<br>2 sessions per week<br>60 min per session<br><br>Stretching out of the water.<br>Aerobic warm-up in the wáter.<br>Passive stretchimg of significant muscle groups.<br>Water aerobics choreagraphy.<br>Strength exercises for major muscle groups.<br>Cool-down. | FIQ<br>Rpar-Q<br>6 MWT<br>Blood analysis: venous puncture.<br>Lyfestyle (diet, habits)<br>Medication<br>Other diseases | EG showed a progressive ↓ in IL-8 concentration during exercise compared to the baseline, while CG variations occurred.<br><br>At the end of the program, the systemic concentration of IL-8<br>EG much lower < CG | A 4-month program was not suficiente to induce anti-inflammatory adaptation<br><br>8-month are neccesary to achieve potential anti-inflammatory adaptation, with a decrease in circulating IL-8, and NA, and a ↓ in neutrophils<br><br>It improved physical function, symptomatology, and quality of life | It was difficult to establish and aceptable CG for eight months, as they went to the pool simultaneously without undergoing the intervention but had the same social life.<br><br>Lack of follow-up after the intervention | No        |

EG: experimental group; GC: control grupo; evaluated variables \*: can be seen in more detail in Supplementary materials 2

| Author                  | Study type                | Sample characteristics                                                                         | Objetives                                                                                                                                                                                                                                            | Intervention                                                                                                                                                                                           | Evaluated variables *                                                                                                                                            | Outcomes                                                                                                                                                                                                                                                                                                                                                                                                                 | Conclusions                                                                                                                                                                                                                                                                                                                                              | Limits                                                                                                                                                                                                                                                                                                                  | Follow up |
|-------------------------|---------------------------|------------------------------------------------------------------------------------------------|------------------------------------------------------------------------------------------------------------------------------------------------------------------------------------------------------------------------------------------------------|--------------------------------------------------------------------------------------------------------------------------------------------------------------------------------------------------------|------------------------------------------------------------------------------------------------------------------------------------------------------------------|--------------------------------------------------------------------------------------------------------------------------------------------------------------------------------------------------------------------------------------------------------------------------------------------------------------------------------------------------------------------------------------------------------------------------|----------------------------------------------------------------------------------------------------------------------------------------------------------------------------------------------------------------------------------------------------------------------------------------------------------------------------------------------------------|-------------------------------------------------------------------------------------------------------------------------------------------------------------------------------------------------------------------------------------------------------------------------------------------------------------------------|-----------|
| Christidis et al., 2015 | Ramdomized Clinical Trial | N=64<br><br>GE= 32<br>Age 53,4±8,6<br><br>GC= 32<br>Age 53,7±9,4<br><br>GE = FM<br>GC =healthy | Investigating levels of proinflammatory cytokines released in the vastus lateralis muscle during repetitive dynamic contractions<br><br>If levels of proinflammatory cytokines correlate with pain or fatigue during repetitive Dynamic contractions | A single sesión of 20 minutes of repeated dynamic contractions<br><br>Extending the knee from a flexed position on a ball and slowly lifting the leg from a 15° a 0° position, then lowering it slowly | EVA<br>VAS<br>Borg 6-20<br>SF-36<br>SF-36-PSC<br>SF-36-MSC<br>HADS<br>Blood<br>análisis: Microdialysate before, during, and after.<br>Before DS, venous puncture | DS:<br>IL-1β showed no changes during the intervention; and no differences between both groups<br><br>IL-6 e IL-8 ↑ during and after the intervention in both groups, but there were no differences in levels between the two groups.<br><br>TNF-α did not change during the intervention in the EG, but ↑↑ in CG<br><br>There were no significant differences in the release of inflammatory cytokines in DS neither BP | There were no differences between the EG and the CG in the release of proinflammatory cytokines<br><br>There was no correlation between the intensity of pain/fatigue in the muscle and the level of proinflammatory cytokines IL-1β, IL-6, IL-8, and TNF-α in DS neither BP<br><br>Speculations include muscle blunting or impaired muscle regeneration | The catheter could cause cellular damage, altering tissue homeostasis up to 7 hours after insertion, leading to a cytokine response from the catheter rather than the intervention<br><br>The release of anti-inflammatory cytokines such as IL-10 was not investigated<br><br>Lack of follow-up after the intervention | No        |

EG: experimental group; GC: control grupo; evaluated variables \*: can be seen in more detail in Supplementary materials 2; BP: Blood Plasma; DS: Dialysate

| Author               | Study type                | Sample characteristics                                                                                                                                                                                                                                                                                                                                    | Objetives                                                                                                                                                                                                                                                                                                                                                                                                        | Intervention                                                                                                                                                                                                                                                                                                                                                                                                                                          | Evaluated variables*                                                                                                                                                                                                          | Outcomes                                                                                                                                                                                                                                                                                                                                                                                                                                                                                                                                   | Conclusions                                                                                                                                                                                                                                                                                                                                                                                                                                                                                                  | Limits                                                                                                                                                                                                                                                                                                                                                                                                               | Follow up |
|----------------------|---------------------------|-----------------------------------------------------------------------------------------------------------------------------------------------------------------------------------------------------------------------------------------------------------------------------------------------------------------------------------------------------------|------------------------------------------------------------------------------------------------------------------------------------------------------------------------------------------------------------------------------------------------------------------------------------------------------------------------------------------------------------------------------------------------------------------|-------------------------------------------------------------------------------------------------------------------------------------------------------------------------------------------------------------------------------------------------------------------------------------------------------------------------------------------------------------------------------------------------------------------------------------------------------|-------------------------------------------------------------------------------------------------------------------------------------------------------------------------------------------------------------------------------|--------------------------------------------------------------------------------------------------------------------------------------------------------------------------------------------------------------------------------------------------------------------------------------------------------------------------------------------------------------------------------------------------------------------------------------------------------------------------------------------------------------------------------------------|--------------------------------------------------------------------------------------------------------------------------------------------------------------------------------------------------------------------------------------------------------------------------------------------------------------------------------------------------------------------------------------------------------------------------------------------------------------------------------------------------------------|----------------------------------------------------------------------------------------------------------------------------------------------------------------------------------------------------------------------------------------------------------------------------------------------------------------------------------------------------------------------------------------------------------------------|-----------|
| Ernberg et al., 2016 | Ramdomized Clinical Trial | <p>N=64</p> <p>EG= 32<br/>Age 57±9<br/>2 participants dropped out. 6 participants were excluded due to technical failure during microdialysis<br/>Total EG =24</p> <p>CG= 32<br/>Age 57±9<br/>2 participants dropped out. 3 participants werre excluded due to technical failure during microdialysis<br/>Total,CG=27</p> <p>EG = FM<br/>CG = healthy</p> | <p>Investiga-<br/>ting the<br/>interstitial<br/>muscle<br/>rélease of<br/>proinflam-<br/>matory<br/>cytokines in<br/>subjetcs<br/>with FM<br/>before and<br/>after the<br/>intervention</p> <p>Determine<br/>if<br/>proinflam-<br/>matory<br/>cytokine<br/>level were<br/>elevated in<br/>subjetcs<br/>with FM<br/>and if they<br/>would<br/>normalize<br/>after 15<br/>weeks of<br/>resistance<br/>exercise</p> | <p>15 weeks<br/>resistance<br/>exercise<br/>2 sessions/<br/>Week<br/>60min/<br/>session<br/>10 min<br/>warm-up-<br/>cycling<br/>50 min –<br/>resistance<br/>exercise<br/>Venous<br/>blood<br/>simples were<br/>taken<br/>befores and<br/>after</p> <p>Dynamic<br/>contractions<br/>– 20 min.<br/>Knee<br/>extensión at<br/>a 15° o 20°<br/>angle. Slow<br/>up and down<br/>movements,<br/>with 5<br/>seconds of<br/>rest between<br/>contractions</p> | <p>PPT<br/>EVA<br/>Borg 6-20<br/>SF-36<br/>SF-36-PSC<br/>SF-36-MSC<br/>HADS<br/>Dinamóme-<br/>tro<br/>6MWT<br/>Análisis de<br/>sangre:<br/>Micro-<br/>diálisis<br/>antes y<br/>después y<br/>punción<br/>venosa<br/>antes</p> | <p>DS<br/>IL-1β showed no<br/>changes<br/>IL-6 and IL-8 had a<br/>similar profile and ↑<br/>during the<br/>intervention in both<br/>groups in both<br/>sessions, but<br/>GE &lt; GC<br/>TNF-α ↑ in both<br/>sessions in both<br/>groups, particularly<br/>after contractions,<br/>with GE&gt;GC<br/>BP before<br/>IL-8 EG &gt; CG<br/>BP after<br/>IL-6 EG &gt; CG</p> <p>IL-6 and IL-8<br/>BP &lt; DS<br/>IL-1β and TNF-α<br/>BP &gt; DS</p> <p>No correlations<br/>between BP and<br/>DS were found in<br/>any session or<br/>groups</p> | <p>There was an<br/>improvement<br/>in muscle<br/>strength and<br/>overall pain<br/>reduction, but<br/>no significant<br/>changes in<br/>muscle (vastus<br/>lateralis) or<br/>peripheral<br/>cytokine level<br/>after the<br/>intervention</p> <p>The only<br/>difference<br/>observed was<br/>that<br/>TNF-α &lt; EG<br/>before the<br/>intervention<br/>and increased<br/>in CG during<br/>contractions</p> <p>No significant<br/>changes in BP<br/>after 15 weeks<br/>of exercice in<br/>either group</p> | <p>The sample<br/>size was small</p> <p>The average<br/>cytokine levels<br/>in the dialysate<br/>during<br/>contractions<br/>were used,<br/>which may<br/>have masked<br/>subtle<br/>changes<br/>between<br/>sessions.</p> <p>The groups<br/>were not<br/>matched for<br/>variables other<br/>than age.</p> <p>Anti-<br/>inflammatory<br/>cytokines such<br/>as IL-10, IL-4,<br/>or IL-13 were<br/>not analyzed.</p> | No        |

EG: experimental group; GC: control grupo; evaluated variables \*: can be seen in more detail in Supplementary materials 2; BP: Blood Plasma; DS: Dialysate

| Author               | Study type                | Sample characteristics                                                                                                                                                                   | Objetives                                                                                                                                                                                      | Intervention                                                                                                                                                                                                                         | Evaluated variables*                                                                                                                                                   | Outcomes                                                                                                                                                                                                                                                                                                                                                                                                                                                                                                                                                                                                          | Conclusions                                                                                                                                                                                                                                                                                                                                                        | Limits                                                                                                                                                                                                                          | Follow up |
|----------------------|---------------------------|------------------------------------------------------------------------------------------------------------------------------------------------------------------------------------------|------------------------------------------------------------------------------------------------------------------------------------------------------------------------------------------------|--------------------------------------------------------------------------------------------------------------------------------------------------------------------------------------------------------------------------------------|------------------------------------------------------------------------------------------------------------------------------------------------------------------------|-------------------------------------------------------------------------------------------------------------------------------------------------------------------------------------------------------------------------------------------------------------------------------------------------------------------------------------------------------------------------------------------------------------------------------------------------------------------------------------------------------------------------------------------------------------------------------------------------------------------|--------------------------------------------------------------------------------------------------------------------------------------------------------------------------------------------------------------------------------------------------------------------------------------------------------------------------------------------------------------------|---------------------------------------------------------------------------------------------------------------------------------------------------------------------------------------------------------------------------------|-----------|
| Ernberg et al., 2018 | Ramdomized Clinical Trial | 1 comparison<br>N=255<br><br>EG= 125<br>Age 51,2±9,4<br><br>CG= 130<br>Age 48,2±11,4<br><br>EG = FM<br>CG = healthy<br><br>2 comparison<br>FM participants<br>N=92<br>EEG= 49<br>ERG= 43 | Comparing circulating cytokines between EG and CG<br><br>Investigate the effect on cytokine levels after 15 weeks of progressive resistance exercise or relaxation therapy in subjects with FM | 15 weeks of pregressive resistance exercise<br>2 sessions/ week<br>60 min / session<br>10 min warm-up-cycling<br>50 min – resistance exercise.<br>Active control relaxation therapy.<br>Venous blood simples taken before and after. | FIQ<br>PPT<br>VAS<br>PCS<br>PDI<br>MFI<br>SF-36<br>SF-36-PSC<br>SF-36-MS<br>HADS<br>Dynamometer<br>measurements.<br>Manual pressure strength<br>6MWT<br>Blood analysis | Baseline EG vs CG:<br>IL-4 excluded<br>IL-2, IL-6, IL-17A y<br>TNF- $\alpha$ , EG>CG<br>IL-1 $\beta$ , EG<CG<br>No significant relationship with the rest of the variables* in both groups<br><br>Both groups showed $\uparrow$ IL-10, IL-17A, IL-2, IL-6, TNF- $\alpha$ , and IL-1ra and decreased PPT values.<br>Significant PDI in EG.<br>No changes in IL-10, IL-2, but IL-1ra showed changes.<br><br>Second EEG vs ERG<br>Baseline, no differences except IL-8, GEE>GER<br>After, IL-1ra $\uparrow$ in both groups<br>IL-1 $\beta$ , EEG<ERG<br>No significant relationship with the rest of the variables*. | Plasma cytokine levels appear to be elevated in the FM group, indicating chronic systemic inflammation 15 weeks resistance exercise, only IL-ra $\uparrow$ . No changes in overall cytokine levels, indicating no anti-inflammatory effect.<br><br>Weak correlations between cytokines and clinical variables were observed.<br><br>Improvement in muscle strength | No control over circadian cytokine release<br><br>Participants no matched base don BMI. The EG had higher BMI and blood pressure that the CG. Some participants had concomitant metabolic síndrome, which affected the results. | No        |

EG: experimental group; CG: control group; EEG: Experimental exercise group; ERG: experimental relaxation group ; evaluated variables \*: can be seen in more detail in Supplementary materials 2

| Author                   | Study type                | Sample characteristics                                                                                                                                                            | Objetives                                                                                                                                                                                                | Intervention                                                                                                                                                                                                                                                                    | Evaluatedv variables*                                                                                                                                       | Outcomes                                                                                                                                                                                                                                                        | Conclusions                                                                                                                                                                                                                                                                                                | Limits                                                                                                   | Follow up |
|--------------------------|---------------------------|-----------------------------------------------------------------------------------------------------------------------------------------------------------------------------------|----------------------------------------------------------------------------------------------------------------------------------------------------------------------------------------------------------|---------------------------------------------------------------------------------------------------------------------------------------------------------------------------------------------------------------------------------------------------------------------------------|-------------------------------------------------------------------------------------------------------------------------------------------------------------|-----------------------------------------------------------------------------------------------------------------------------------------------------------------------------------------------------------------------------------------------------------------|------------------------------------------------------------------------------------------------------------------------------------------------------------------------------------------------------------------------------------------------------------------------------------------------------------|----------------------------------------------------------------------------------------------------------|-----------|
| Jablochkoba et al., 2019 | Ramdomized Clinical Trial | 1 comparison<br>N=100<br><br>EG= 75<br>Age 50,8±9,6<br><br>CG= 25<br>Age 47,6±12,8<br><br>EG = FM<br>CG = healthy<br><br>2 comparison<br>FM subjets<br>N=75<br>EEG= 41<br>ERG= 34 | Comparing plasma levels of BDNF and NGF between EG and CG<br><br>Investigate correlations between BDNF, NGF, cytokines, and clinical variables<br><br>Investigate the effect of exercise on these levels | 15 weeks of resistance exercise<br>2 sessions/week<br>60min/session<br>10 min carm-up<br>50 min – lower limb resistance exercise<br><br>Active control relaxation therapy<br>2 sessions/ week<br>25 min/session<br>Mental exercise, relaxation, auto-suggestion, and stretching | FIQ<br>PPT<br>EVA<br>PCS<br>MFI<br>SF-36<br>SF-36-PSC<br>SF-36-MS<br>HADS<br>Blood análisis: venous puncture<br>Plasma samples<br>N=100<br>before and after | 1º<br>NGF<br>EG<CG<br>BDNF<br>EG>CG<br>IL-8 EG>CG<br>IL-1β EG<CG<br><br>2º No correlation between BDNF, NGF, and cytokines to differentiate between both groups<br><br>3º No significant changes in NGF and BDNF level in EG before or after both interventions | They suggest that the exercise program affects the muscle's metabolic profiles but does not impact the immune profiles in EG's plasma<br><br>15 weeks of resistance exercise does not normalize a profile of chronic inflammation.<br><br>Disruption of BDNF and NGF is essential for nociception and pain | Insufficient recovery time after interventions to normalize NGF and BDNF levels<br><br>Lack of follow-up | No        |

EG: experimental group; CG: control group; EEG: Experimental exercise group; ERG: experimental relaxation group ; evaluated variables \*: can be seen in more detail in Supplementary materials 2; NGF: nerve growth factor; BDNF: brain-derived neurotrophic factor

| Author            | Study type                                                 | Sample characteristics                                                                                                                | Objetives                                                                                                                                                                                    | Intervention                                                                                                                                                                                                                        | Evaluated variables*                                                                                      | Outcomes                                                                                                                                                                                                                       | Conclusions                                                                                                                                                                                                                   | Limits            | Follow up |
|-------------------|------------------------------------------------------------|---------------------------------------------------------------------------------------------------------------------------------------|----------------------------------------------------------------------------------------------------------------------------------------------------------------------------------------------|-------------------------------------------------------------------------------------------------------------------------------------------------------------------------------------------------------------------------------------|-----------------------------------------------------------------------------------------------------------|--------------------------------------------------------------------------------------------------------------------------------------------------------------------------------------------------------------------------------|-------------------------------------------------------------------------------------------------------------------------------------------------------------------------------------------------------------------------------|-------------------|-----------|
| Salm et al., 2019 | A double-blind, randomized, placebo-controlled pilot study | 1 comparison<br>N=28<br><br>AE + CGFIR = 14<br>Age 52,8±10<br><br>AE + PG NO-cFIR= 14<br>Age 50,4±7,9<br><br>CGFIR+ PG<br>NO-cFIR= FM | Evaluating the effect of the combination of AE with cFIRs on pain inflammation markers (TNF- $\alpha$ , IL-6, and IL-10), as well as pain thresholds and quality of life in subjects with FM | 6 weeks of aquatic exercise in a heated pool (32±2°) 3 sessions/week 18-50 min/session<br>Stretching for 5-7min<br>Aerobic and strength exercise in the water<br><br>Use infrared shirts and placebos for 6 to 8 hours during sleep | FIQ<br>EVA<br>VAS<br>SF-MPQ<br>Blood analysis: venous puncture before and after.<br>Infrared thermography | ↓ pain in CGFIR<br>↓ FIQ in CGFIR<br>↓ body temperature, especially in the costochondral area, in the CGFIR<br><br>↓IL-6 in both groups<br>No differences in TNF- $\alpha$ and IL-10, neither within groups nor between groups | They suggest that the combination of FIR enhances the benefits of AE training programs in FM patients, based on the results in pain reduction, IL-6 level, body temperature, and improved quality of life in subjects with FM | Small sample size | No        |

PG NO-cFIR= placebo group no Far-infrared Emitting Ceramics; CGFIR= control group with Far-infrared Emitting Ceramics; AE= Aquatic exercise

| Author                           | Study type     | Sample characteristics                                                                      | Objetives                                                                                                                                                                                                                                                                                                                                                                                                                     | Intervention                                                                                                                                                                                                                                                                                                                                                        | Evaluatedv variables*                                                                                                                                                                                                              | Outcomes                                                                                                                                                                                                                                                                                                                                                                                                           | Conclusions                                                                                                                                                                                                                                                                                | Limits                                                                                                                                                                                                                    | Follow up |
|----------------------------------|----------------|---------------------------------------------------------------------------------------------|-------------------------------------------------------------------------------------------------------------------------------------------------------------------------------------------------------------------------------------------------------------------------------------------------------------------------------------------------------------------------------------------------------------------------------|---------------------------------------------------------------------------------------------------------------------------------------------------------------------------------------------------------------------------------------------------------------------------------------------------------------------------------------------------------------------|------------------------------------------------------------------------------------------------------------------------------------------------------------------------------------------------------------------------------------|--------------------------------------------------------------------------------------------------------------------------------------------------------------------------------------------------------------------------------------------------------------------------------------------------------------------------------------------------------------------------------------------------------------------|--------------------------------------------------------------------------------------------------------------------------------------------------------------------------------------------------------------------------------------------------------------------------------------------|---------------------------------------------------------------------------------------------------------------------------------------------------------------------------------------------------------------------------|-----------|
| Torgrimson - Ojerio et al., 2014 | Clinical trial | N=28<br><br>EG= 20<br>Age 52±1,4<br><br>CG= 16<br>Age 52,2±1,5<br><br>EG= FM<br>CG= healthy | Generating preliminary evidence that muscle repair processes are insufficient (deficiency of the GH/IGF-1 axis) and anti-inflammatory mechanisms are impaired (blunted cortisol, IL-10, and IL-1ra), resulting in an exaggerated response of proinflammatory cytokines to strenuous unaccustomed exercise (IL-1β, TNF-α, IL-6, IL-8), leading to worsened muscle pain, stiffness, and fatigue in the days following exercise. | A modifies Blake treadmill test was performed Patients fasted for 12 hours, 12 ECG electrodes and a respiratory Exchange mask were used until voluntary exhaustion<br><br>The maximal exercise test had to meet the following criterio: RER>1,1 for 30 consecutive seconds BORG =10<br><br>Blood analysis before, during máximo exercise, and 60 min after exercise | FIQR<br>SIQR<br>PPT<br>MTPS<br>FTPS<br>Borg 6e-20<br>BDI-tR<br>Prueba VO2<br>ECG<br>ECTG<br>Blood análisis: venous puncture before, during máximo exercise, and after 60 min. Lifestyle (diet, habits). Medication. other diseases | IL-1β and IL-1ra were below the detection threshold. No data are shown<br><br>During exercise: IL-6↑ in both groups<br>IL-10 ↑ in CG<br>IL-10 ↓ in EG<br>TNF-α ↓ in CG<br><br>After 60 min IL-8 ↓ in CG<br>IL-8 ↑ in EG<br>IL-6 ↓ faster in the CG than in EG<br><br>4 days after exercise: IL-6, IL-10, and TNF- α showed no significant changes<br>After exercise: IL-8 in CG remained the same.<br>IL-8 ↓ in EG | No evidence that increased muscle pain or sensitivity, stiffness, and post exertion fatigue were mediated by changes in circulating inflammatory cytokines during exercise or in the following days.<br><br>The expected anti-inflammatory response to exercise was lower in women with FM | Small sample size<br><br>EG was compared to a healthy control group instead of a group with pain disorders unrelated to FM.<br><br>Estradiol levels, which may influence cytokine response to exercise, were not measured | No        |

EG: experimental group; CG: control group; evaluated variables \*

Supplementary Materials Table S2.- Studied cytokines

| AUTHOR                           | STUDIED CYTOKINES |     |         |       |       |       |     |       |     |        |         |        |                |     |
|----------------------------------|-------------------|-----|---------|-------|-------|-------|-----|-------|-----|--------|---------|--------|----------------|-----|
|                                  | IL- 1 $\beta$     |     | IL- 1ra | IL- 2 | IL- 4 | IL- 6 |     | IL- 8 |     | IL- 10 | IL- 17A | IL- 18 | TNF - $\alpha$ |     |
|                                  | VP                | DS  | VP      | VP    | VP    | VP    | DS  | VP    | DS  | VP     | VP      | VP     | VP             | DS  |
| Bote et al., 2013                | 🔴                 |     |         |       |       | 🔴     |     | 🔴     |     | 🔴      |         | 🔴      | 🔴              |     |
| Bote et al., 2014                |                   |     |         |       |       |       |     | 🔴     |     |        |         |        |                |     |
| Christidis et al., 2015          | 🔴                 | 🔴   |         |       |       | 🔴     | 🔴   | 🔴     | 🔴   |        |         |        | 🔴              | 🔴   |
| Ernberg et al., 2016             | 🔴                 | 🔴   |         |       |       | 🔴     | 🔴   | 🔴     | 🔴   |        |         |        | 🔴              | 🔴   |
| Ernberg et al., 2018             | 🔴                 |     | 🔴       | 🔴     | 🔴     | 🔴     |     | 🔴     |     | 🔴      | 🔴       |        | 🔴              |     |
| Jablochkova et al., 2019         | 🔴                 |     | 🔴       | 🔴     | 🔴     | 🔴     |     | 🔴     |     | 🔴      | 🔴       |        | 🔴              |     |
| Salm et al., 2019                |                   |     |         |       |       | 🔴     |     |       |     | 🔴      |         |        | 🔴              |     |
| Torgrimson – Ojerio et al., 2014 | 🔴                 |     | 🔴       |       |       | 🔴     |     | 🔴     |     | 🔴      |         |        | 🔴              |     |
| %                                | 75%               | 25% | 37,5%   | 25%   | 25%   | 87,5% | 25% | 87,5% | 25% | 62,5%  | 25%     | 12,5%  | 87,5%          | 25% |

VP: venous puncture; DS: dialysate

Supplementary Materials Table S3.- Analysis of the studied cytokines in groups of healthy subjects and subjects with FM

| CYTOKINES/<br>AUTHOR | Bote et al.,<br>2013 <sup>(16)</sup> |   |    |   | Bote et al., 2014<br>(15) |   |    |   | Christidis et al.,<br>2015 <sup>(17)</sup> |   |    |   | Ernberg 2016 <sup>(18)</sup> |   |    |   | Ernberg et al., 2018*<br>(21) |   |    |   | Jablochkova et al.,<br>2019* (22) |   |    |   | Salm et al., 2019*<br>(19) |   |    |   | Torggrimson- Ojerio et<br>al.,2014 <sup>(20)</sup> |    |    |    |
|----------------------|--------------------------------------|---|----|---|---------------------------|---|----|---|--------------------------------------------|---|----|---|------------------------------|---|----|---|-------------------------------|---|----|---|-----------------------------------|---|----|---|----------------------------|---|----|---|----------------------------------------------------|----|----|----|
|                      | CG                                   |   | EG |   | CG                        |   | EG |   | CG                                         |   | EG |   | CG                           |   | EG |   | CG                            |   | EG |   | CG                                |   | EG |   | CG                         |   | EG |   | CG                                                 |    | EG |    |
|                      | B                                    | A | B  | A | B                         | A | B  | A | B                                          | A | B  | A | B                            | A | B  | A | B                             | A | B  | A | B                                 | A | B  | A | B                          | A | B  | A | B                                                  | A  | B  | A  |
| <i>IL-1β</i>         | ↓                                    | ↑ | ↑  | ↓ |                           |   |    |   | ↑                                          |   | ↓  |   | ↑                            | ↑ | ↓  | ↑ | ↑                             |   | ↓  | ↓ | ↑                                 |   | ↓  |   |                            |   |    |   |                                                    |    |    |    |
| <i>IL-1 RA</i>       |                                      |   |    |   |                           |   |    |   |                                            |   |    |   |                              |   | ↑  |   | ↓                             | ↓ | ↑  |   | ↓                                 |   |    |   |                            |   |    |   |                                                    |    |    |    |
| <i>IL-2</i>          |                                      |   |    |   |                           |   |    |   |                                            |   |    |   |                              |   | ↓  |   | ↑                             | ↓ | ↓  |   | ↑                                 |   |    |   |                            |   |    |   |                                                    |    |    |    |
| <i>IL-6</i>          | ↓                                    | ↑ | ↑  | ↓ |                           |   |    |   | ↓                                          |   | ↑  |   | ↓                            | ↑ | ↑  | ↑ | ↓                             |   | ↑  | ↓ | ↓                                 |   | ↑  |   |                            |   |    |   | ↓                                                  | ↑↓ | ↓  | ↑= |
| <i>IL-8</i>          | ↓                                    | ↑ | ↑  | ↓ | ↑                         | ↑ | ↑  | ↓ | ↓                                          |   | ↑  |   | ↓                            | ↑ | ↑  | ↓ | ↓                             |   | ↑  | ↓ | ↓                                 |   | ↑  |   |                            |   |    | ↑ | ↓=                                                 | ↑  | ↓↓ |    |
| <i>IL-10</i>         | ↓                                    | ↑ | ↑  | ↓ |                           |   |    |   |                                            |   |    |   |                              |   | ↓  |   | ↑                             | ↓ | ↓  |   | ↑                                 |   |    |   |                            |   |    | ↓ | ↑=                                                 | ↓  | =  |    |
| <i>1L-17A</i>        |                                      |   |    |   |                           |   |    |   |                                            |   |    |   |                              |   | ↓  |   | ↑                             | ↓ | ↓  |   | ↑                                 |   |    |   |                            |   |    |   |                                                    |    |    |    |
| <i>IL-18</i>         | ↓                                    | ↑ | ↑  | ↓ |                           |   |    |   |                                            |   |    |   |                              |   |    |   |                               |   |    |   |                                   |   | ↑  |   |                            |   |    |   |                                                    |    |    |    |
| <i>TNF- α</i>        | ↓                                    | ↑ | ↑  | ↓ |                           |   |    |   | ↓                                          |   | ↑  |   | ↓                            | ↑ | ↑  | ↓ | ↓                             |   | ↑  | ↓ | ↓                                 |   | ↑  |   |                            |   |    | ↑ | ↓=                                                 | ↓  | =  |    |

CG: healthy control group; EG: FM experimental group; B: before the intervention; A: after the intervention; the arrows ↓ ↑ in the A column indicate whether the cytokine levels are low or high compared to the experimental group and viceversa. The arrows ↓ ↑ in the A column compare to the B column of each group; \* Ernberg y Jablochkova compared baseline data between the healthy and FM groups, but not post-intervention because it was done between two FM groups. However, post-intervention in the FM group was compared.; \*Salm only conducted an intervention with tow FM groups. In the case of Torggrimson-Ojerio, in the A column, there are two symbols, the first representing 60 min after the intervention and the second representing the results after four days of the intervention.

**Supplementary Materials Table S4.-** Rick of bias assessment.

| <b>Author/Domain</b>  | <b>Selection bias</b> | <b>Performance bias</b> | <b>Detection bias</b> | <b>Attrition bias</b> | <b>Reporting bias</b> | <b>Other bias</b> |
|-----------------------|-----------------------|-------------------------|-----------------------|-----------------------|-----------------------|-------------------|
| Bote 2013             | High risk of bias     | Low risk of bias        | Low risk of bias      | Low risk of bias      | Low risk of bias      | Low risk of bias  |
| Bote 2013             | High risk of bias     | Low risk of bias        | Low risk of bias      | Low risk of bias      | Low risk of bias      | Low risk of bias  |
| Christidis 2015       | Low risk of bias      | Low risk of bias        | Low risk of bias      | Low risk of bias      | Low risk of bias      | Low risk of bias  |
| Ernberg 2016          | Low risk of bias      | Low risk of bias        | Low risk of bias      | Low risk of bias      | Low risk of bias      | High risk of bias |
| Ernberg 2018          | Low risk of bias      | Low risk of bias        | Low risk of bias      | Low risk of bias      | Low risk of bias      | High risk of bias |
| Jablochkova 2019      | Low risk of bias      | Low risk of bias        | Low risk of bias      | Low risk of bias      | Low risk of bias      | Low risk of bias  |
| Salm 2018             | Low risk of bias      | Low risk of bias        | Low risk of bias      | Low risk of bias      | Low risk of bias      | Low risk of bias  |
| Torgimson-Ojerio 2014 | High risk of bias     | Low risk of bias        | Low risk of bias      | Low risk of bias      | Low risk of bias      | High risk of bias |
